# Supplementary material
Source: PubMed Central journal article supplement (PMC3280423)
Supplement: NIHMS351558-supplement-1.pdf [file NIHMS351558-supplement-1.pdf]

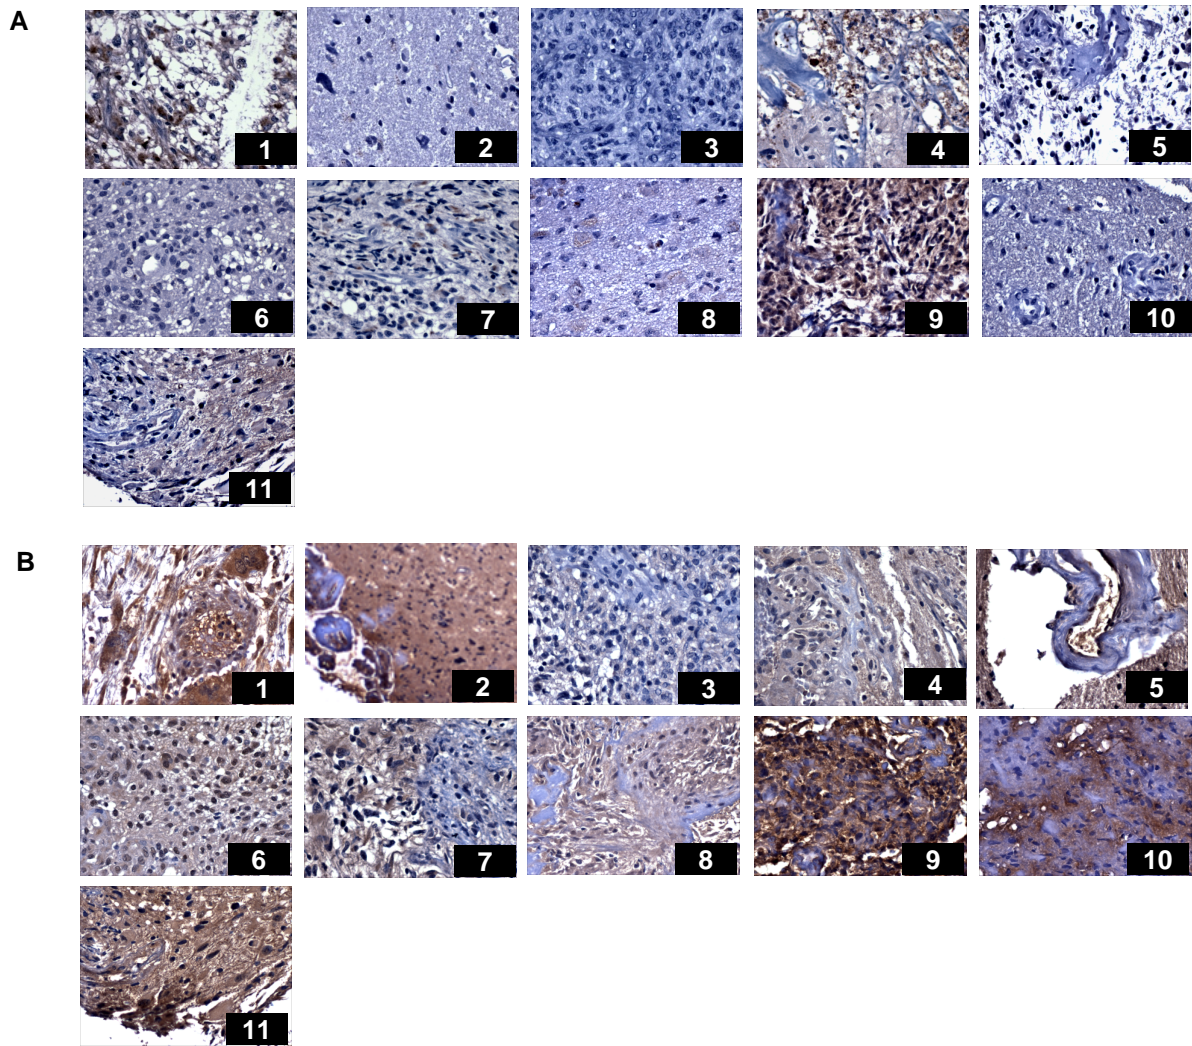

**Supplemental Digital Content 1. Details of immunohistochemistry (IHC) for (A.) pp65 and (B.) IE1 in primary GBM samples performed on 11 paraffin embedded primary GBM samples.**
