# Supplementary material
Source: PubMed Central journal article supplement (PMC3280423)
Supplement: NIHMS351558-supplement-2.pdf [file NIHMS351558-supplement-2.pdf]

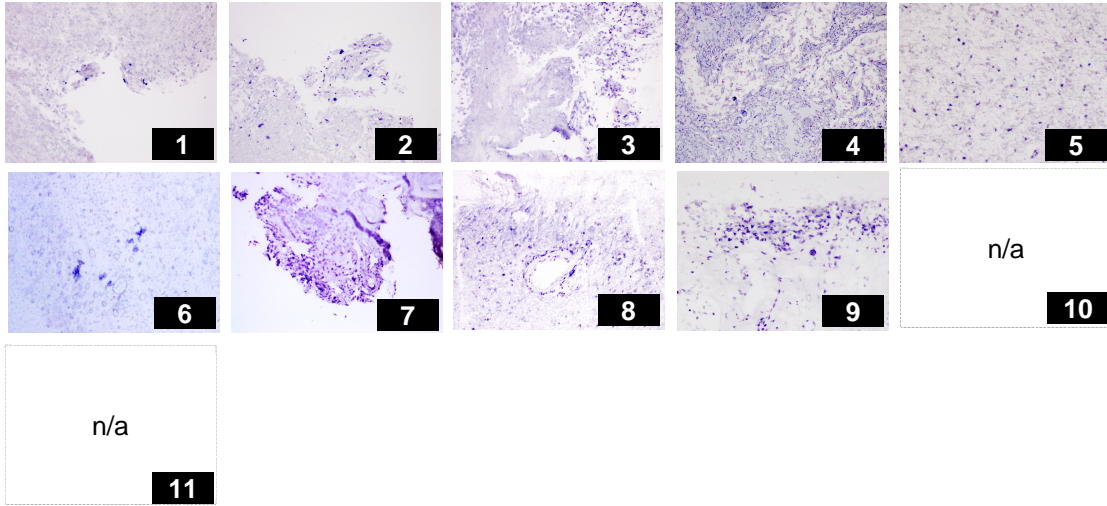

**Supplemental Digital Content 2. Details of in situ hybridization (ISH) in primary GBM samples performed on 11 paraffin embedded primary GBM samples.**
